# Supplementary figures and images for: Identification of an inhibitory neuron subtype, the L-stellate cell of the cochlear nucleus
Source: eLife journal article supplement (doi:10.7554/elife.54350), 2020-11-03

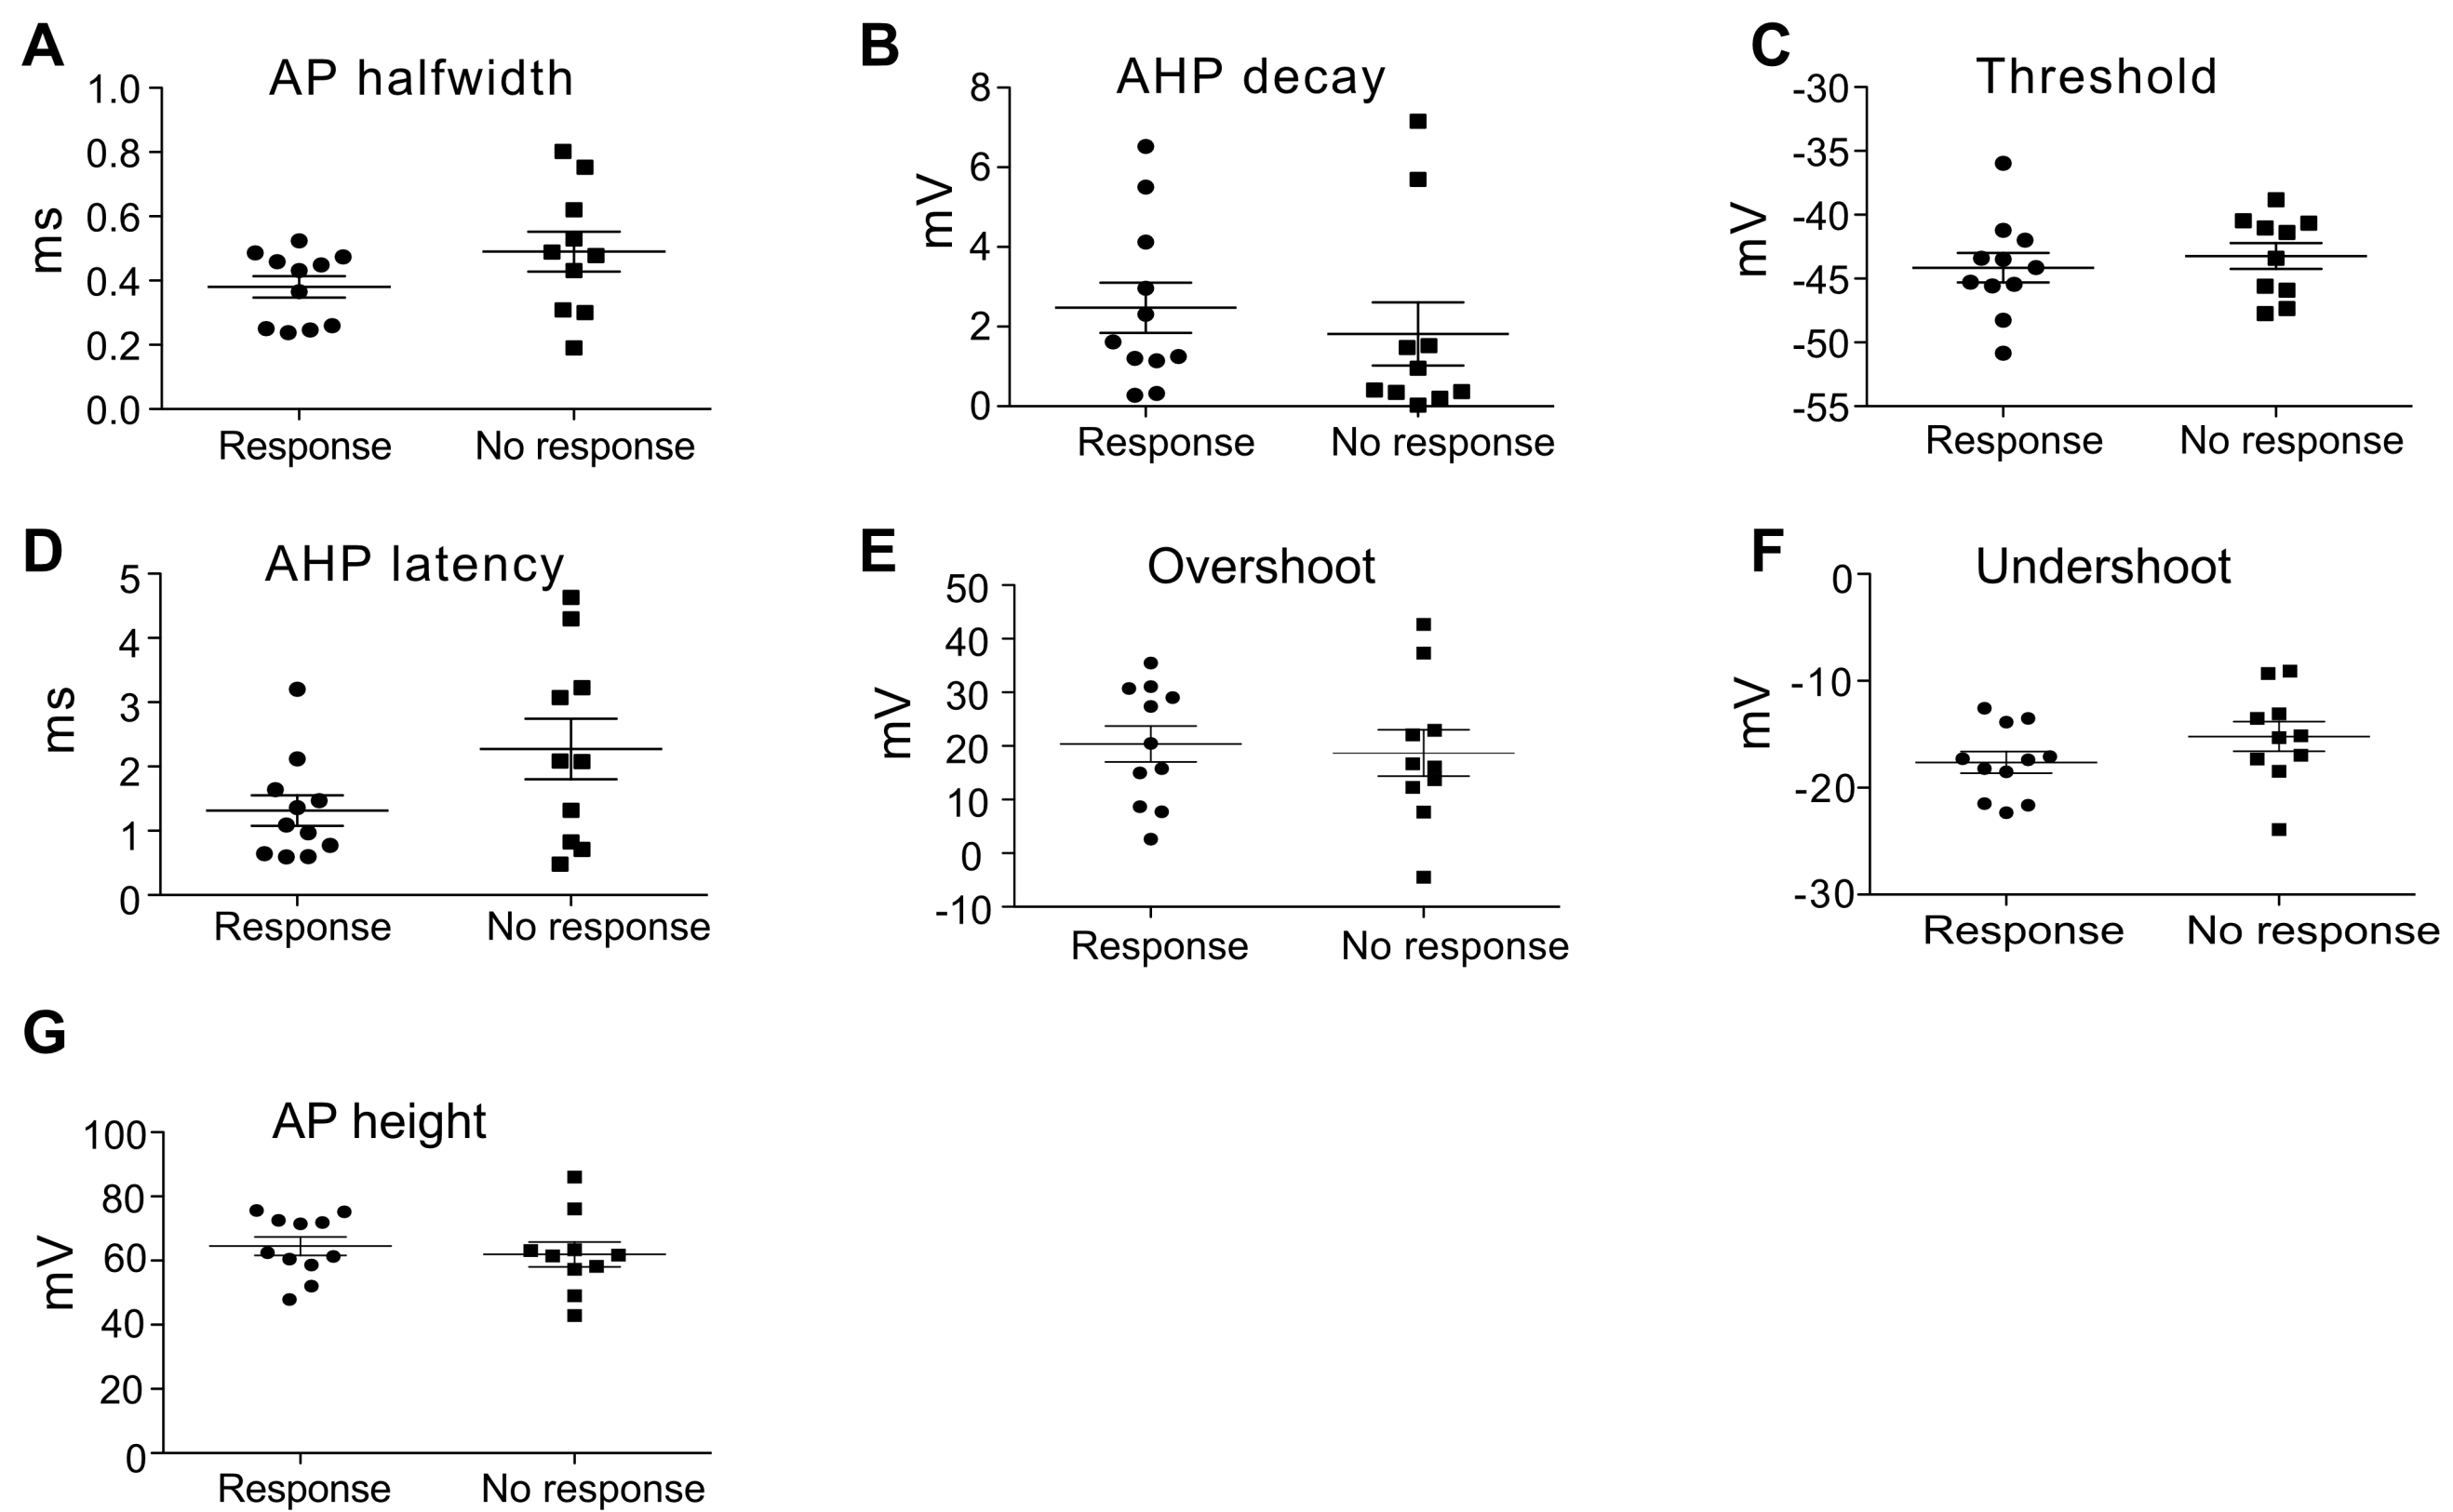

Supplement: supp [file elife_poa_e54350_Figure_6_figure_supplement_1.pdf › elife_poa_e54350_Figure_6_figure_supplement_1.pdf]
